# Supplementary material for: Gingerol Synergizes the Cytotoxic Effects of Doxorubicin against Liver Cancer Cells and Protects from Its Vascular Toxicity
Source: PubMed Central journal article supplement (PMC6274287; doi:10.3390/molecules21070886), 2016-07-08
Supplement: molecules-21-00886-s001.pdf [file molecules-21-00886-s001.pdf]

# Supplementary Materials: Gingerol Synergizes the Cytotoxic Effects of Doxorubicin against Liver Cancer Cells and Protects from Its Vascular Toxicity

Fahad A. Al-Abbasi, Eman A. Alghamdi, Mohammed A. Baghdadi, Abdulmohsin J. Alamoudi, Ali M. El-Halawany, Hany M. El-Bassossy, Ali H. Aseeri and Ahmed M. Al-Abd

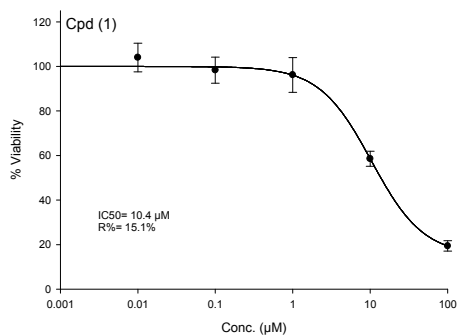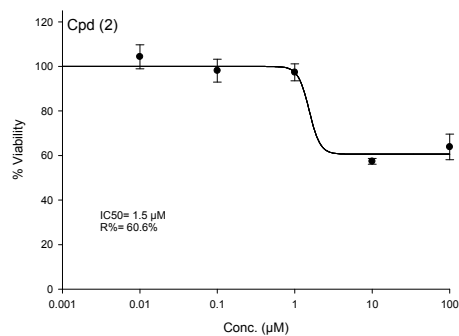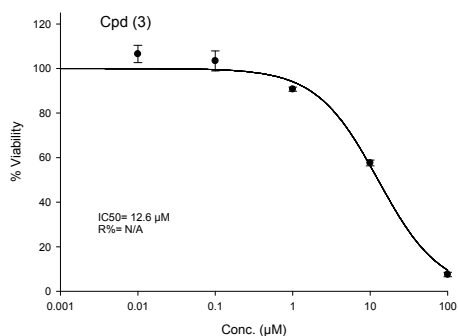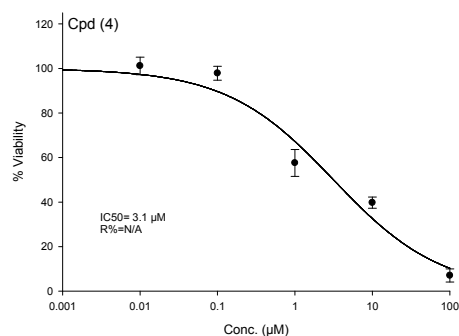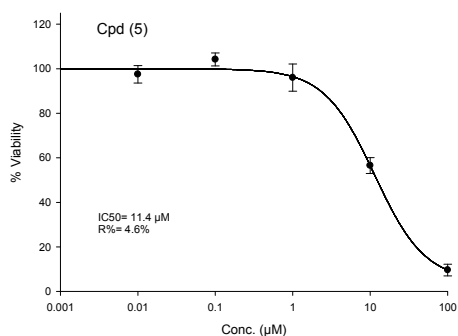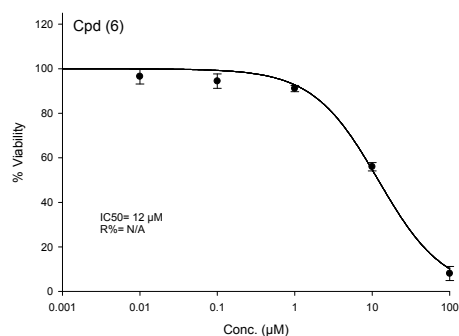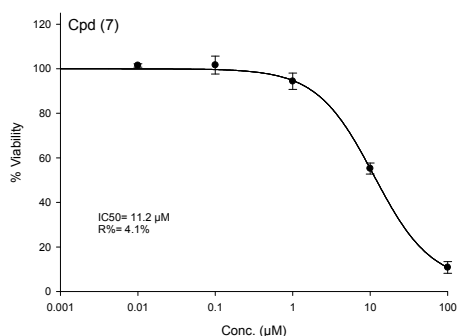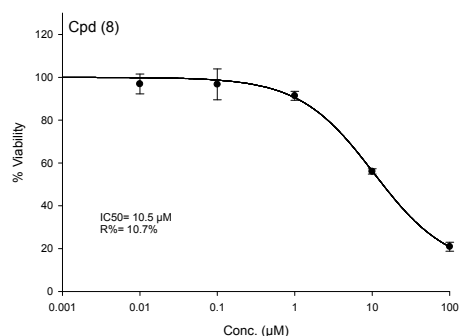

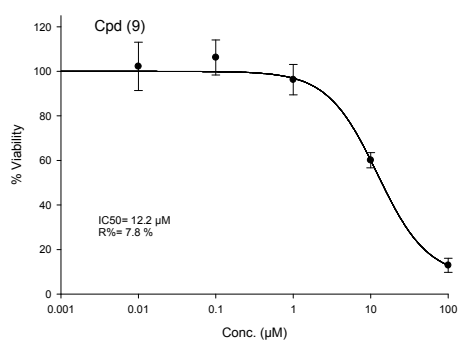

**Figure S1.** Dose response curves of different naturally occurring hydroxyphenylalkanes and diarylheptanoids against HCT-116 cells.

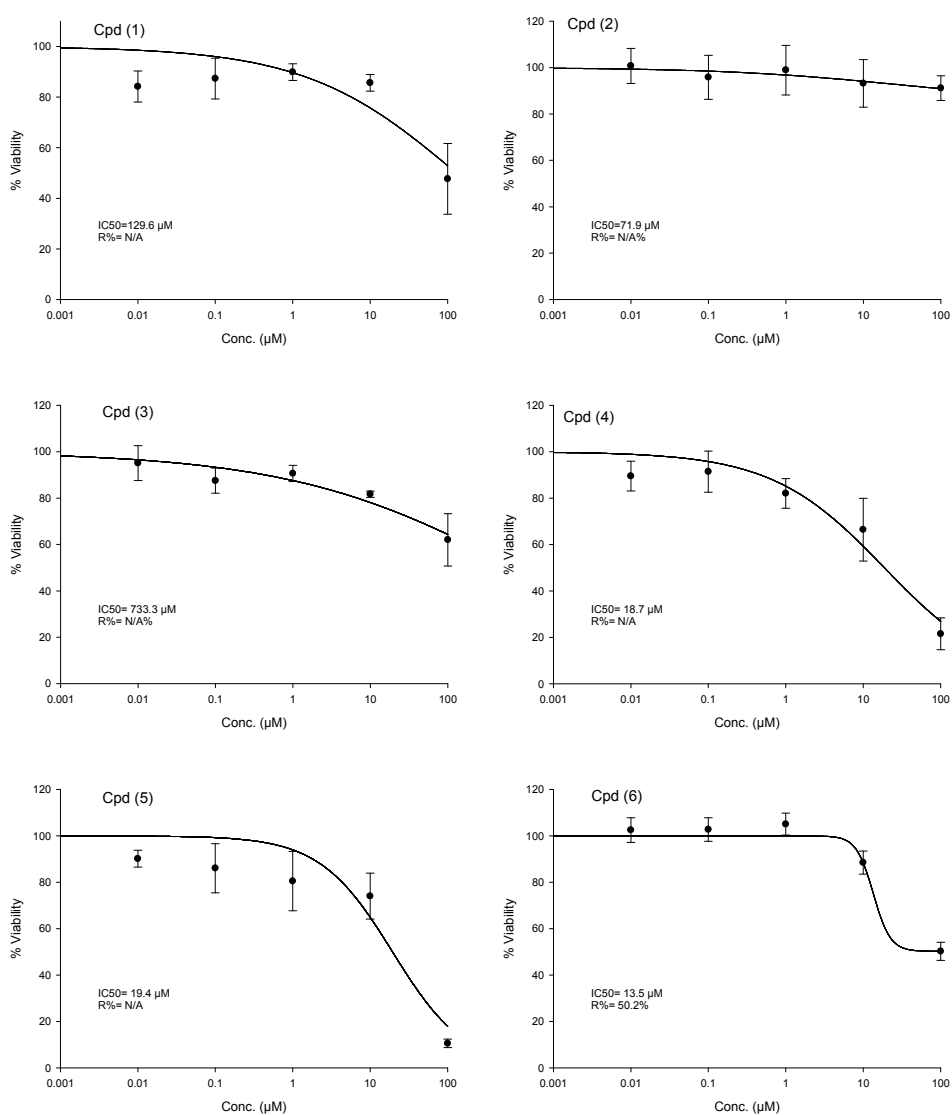

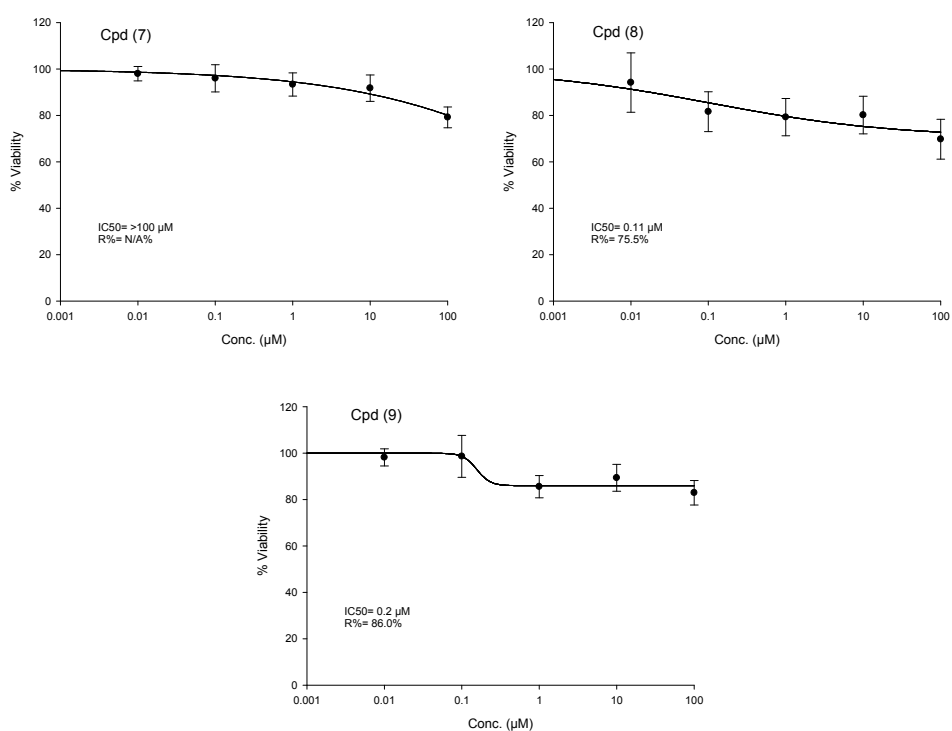

**Figure S2.** Dose response curves of different naturally occurring hydroxyphenylalkanes and diarylheptanoids against HepG2 cells

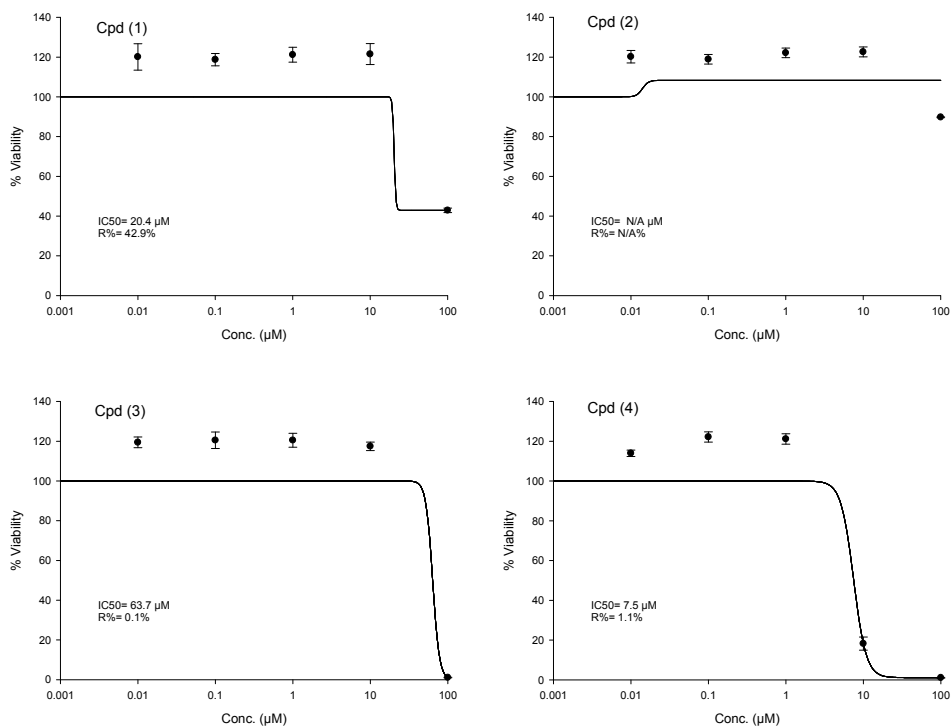

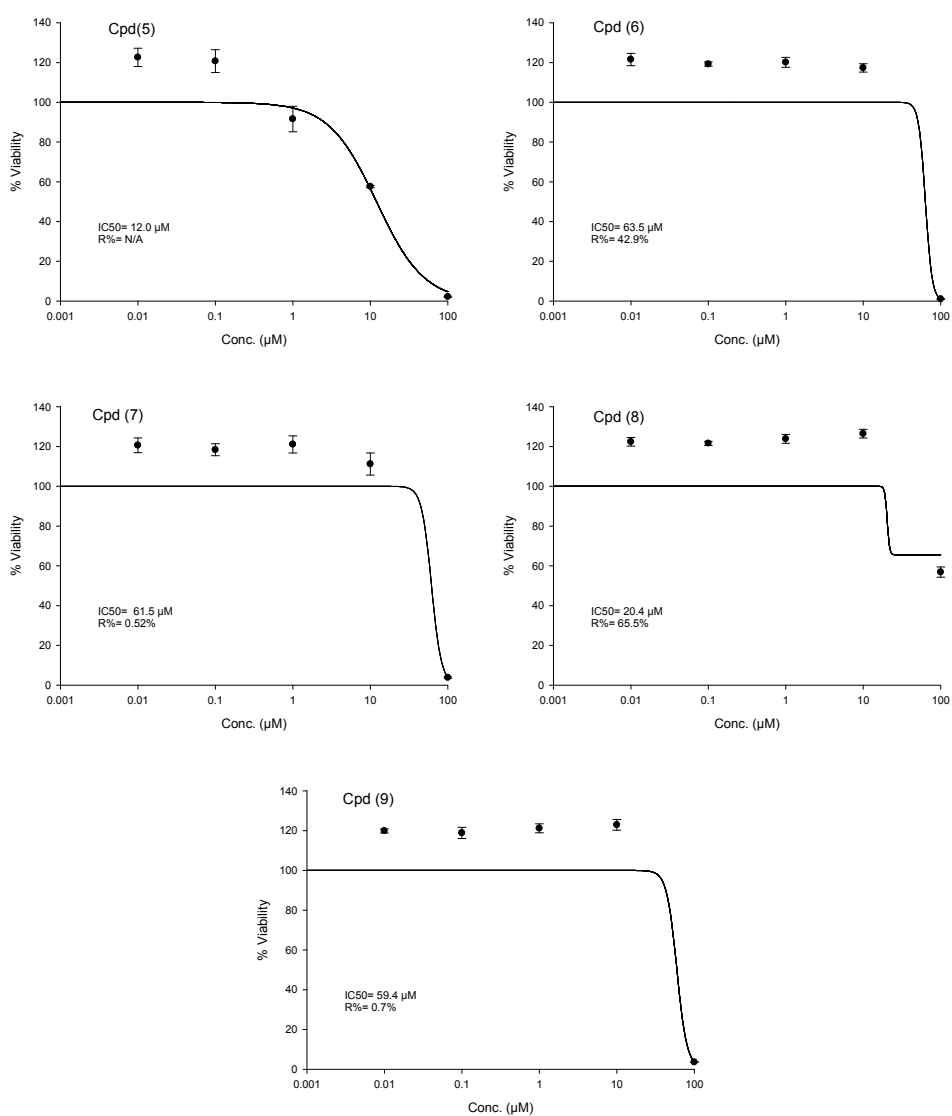

**Figure S3.** Dose response curves of different naturally occurring hydroxyphenylalkanes and diarylheptanoids against MCF-7 cells.

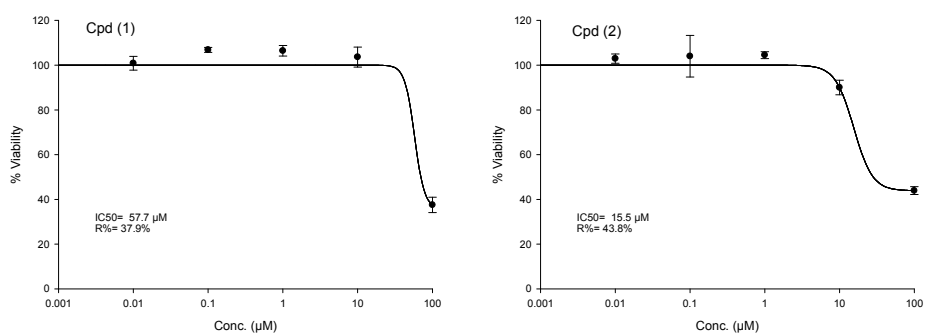

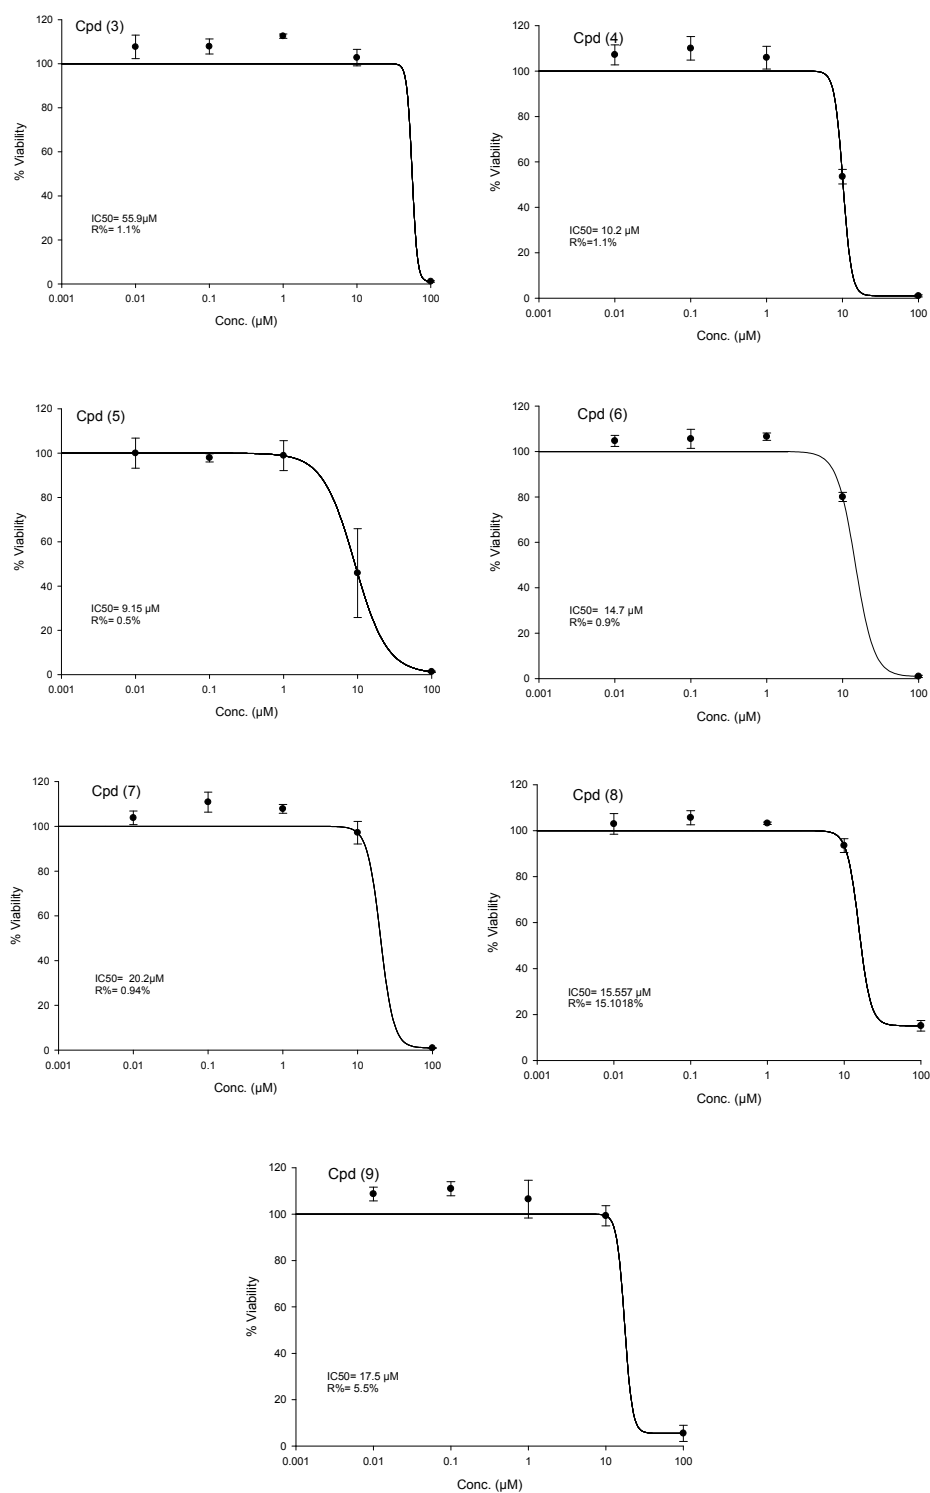

**Figure S4.** Dose response curves of different naturally occurring hydroxyphenylalkanes and diarylheptanoids against HeLa cells.

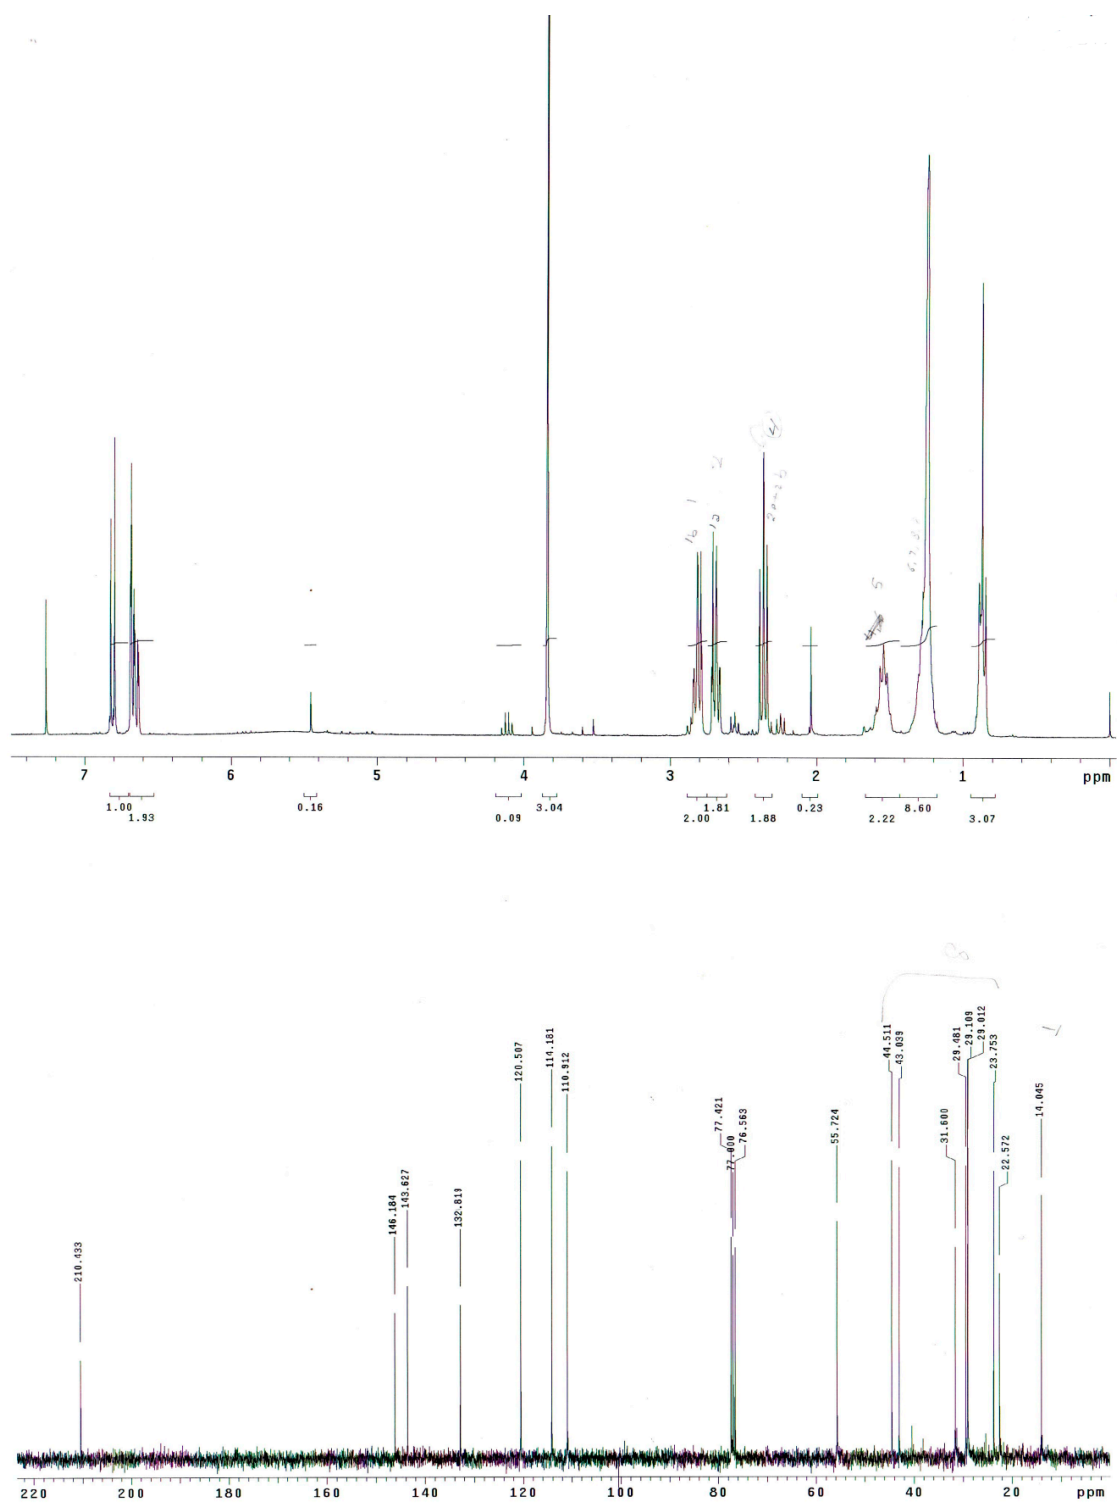Figure S5.  $^1\text{H}$  and  $^{13}\text{C}$ -NMR charts of 6-paradol (1).



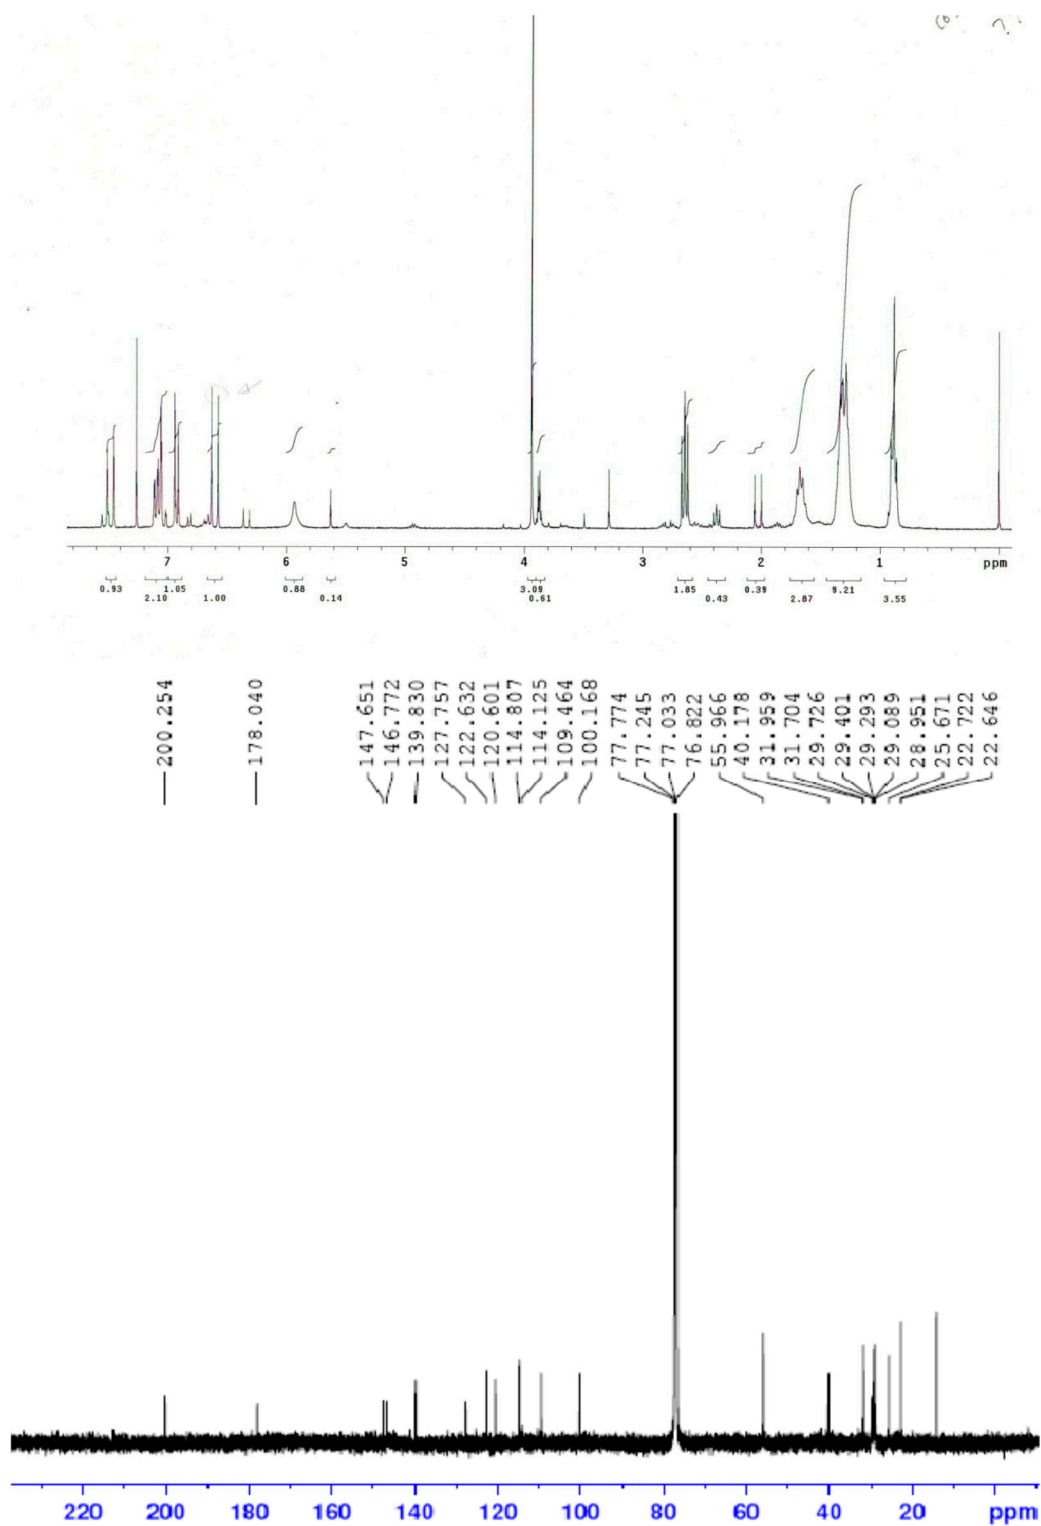Figure S7.  $^1\text{H}$  and  $^{13}\text{C}$ -NMR charts of dehydrogingerdione (3).



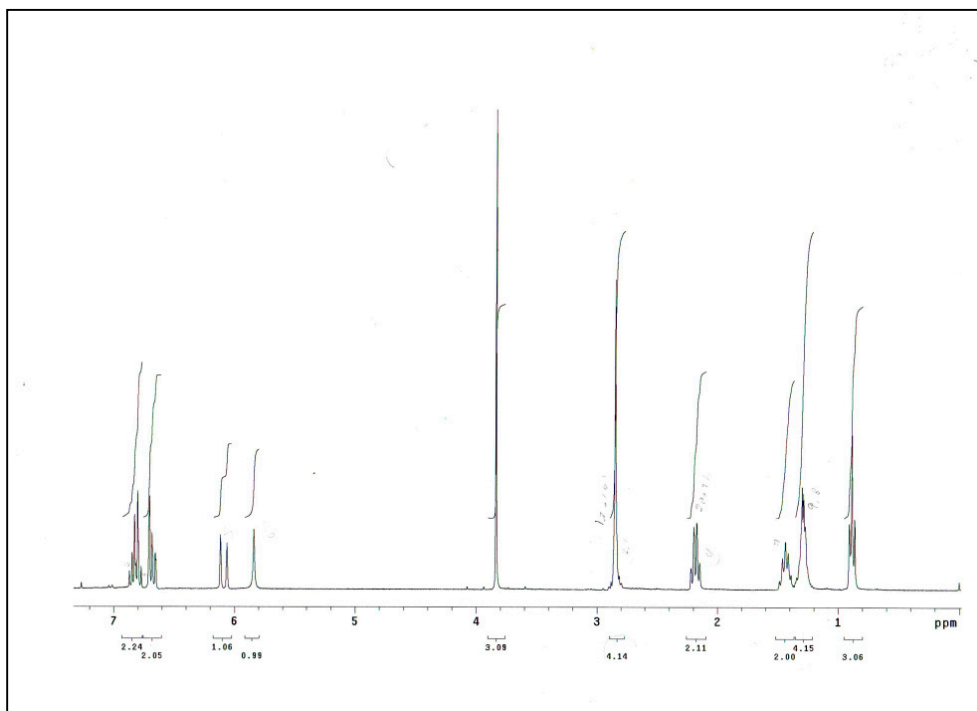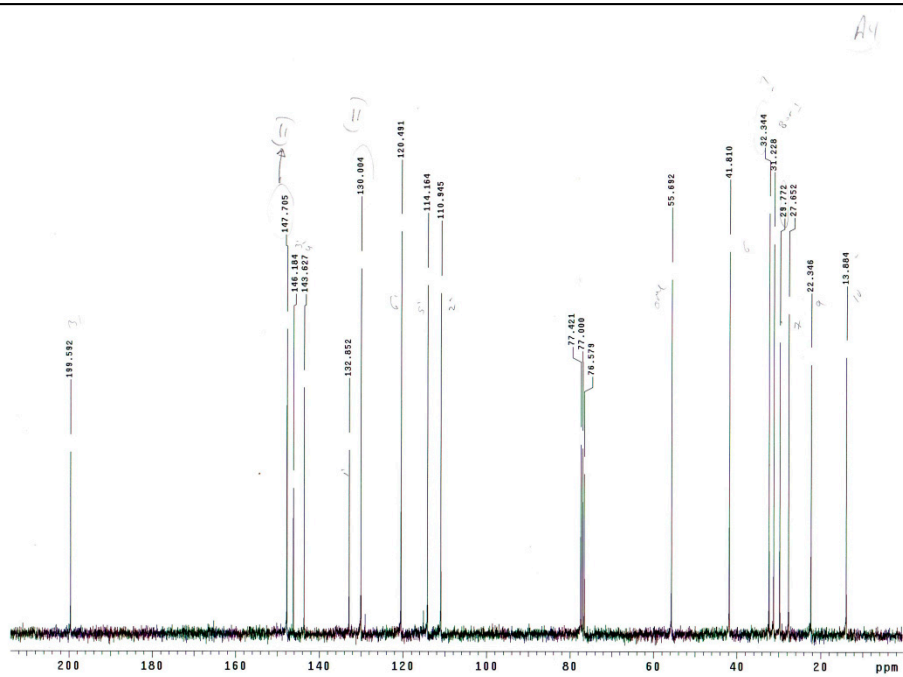

Figure S8. <sup>1</sup>H and <sup>13</sup>C-NMR charts of 6-shogol (4).

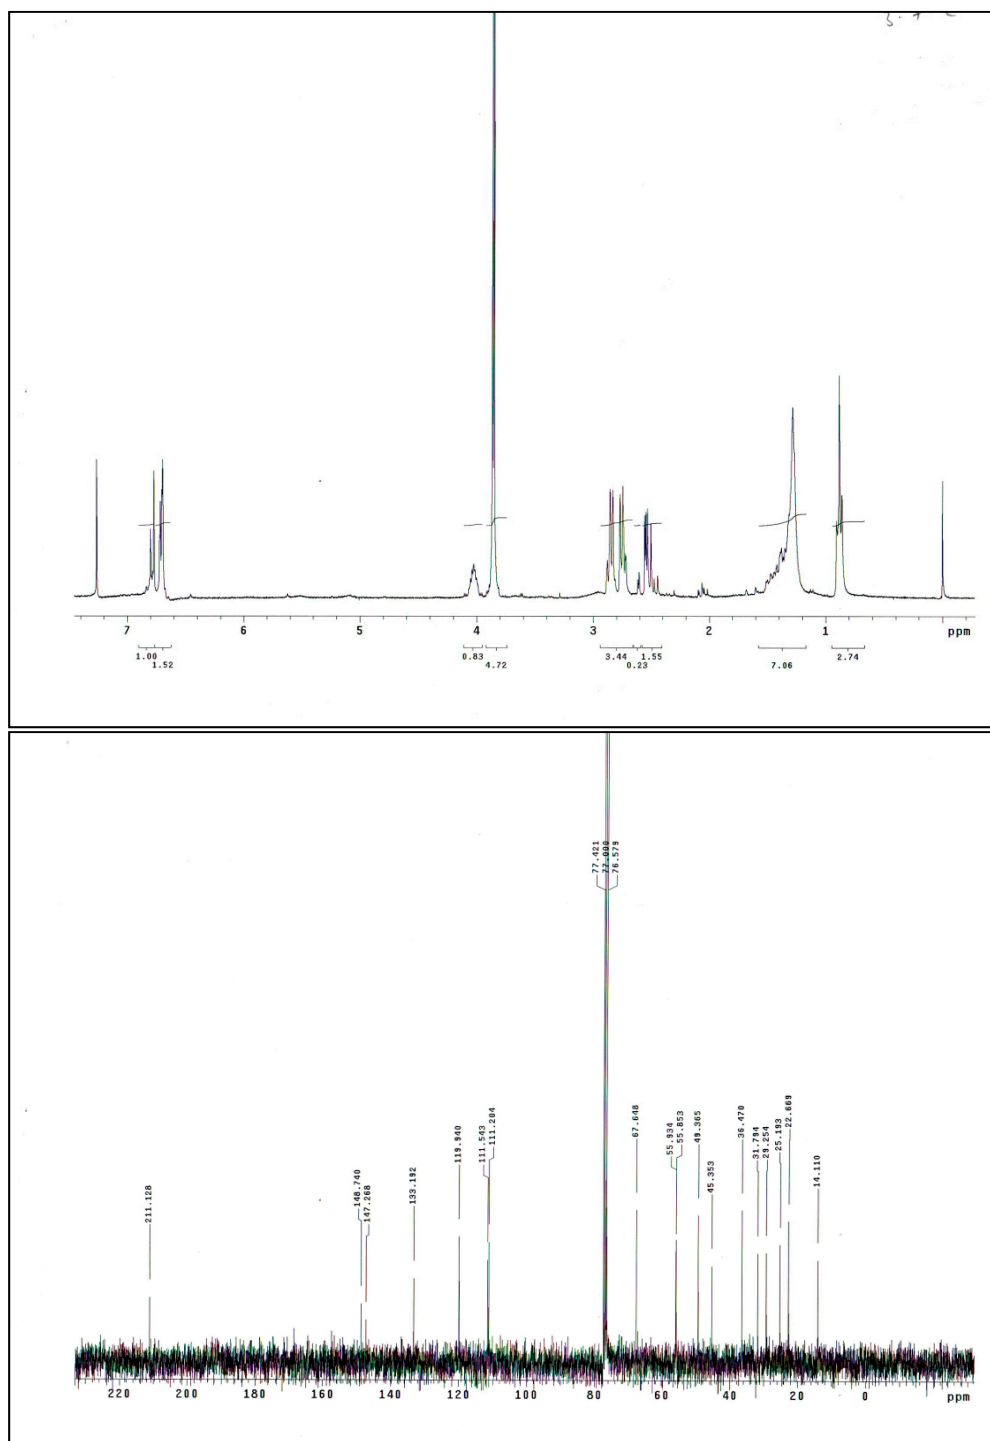

Figure S9. <sup>1</sup>H and <sup>13</sup>C-NMR charts of 4'-methoxy-6-gingerol (5).

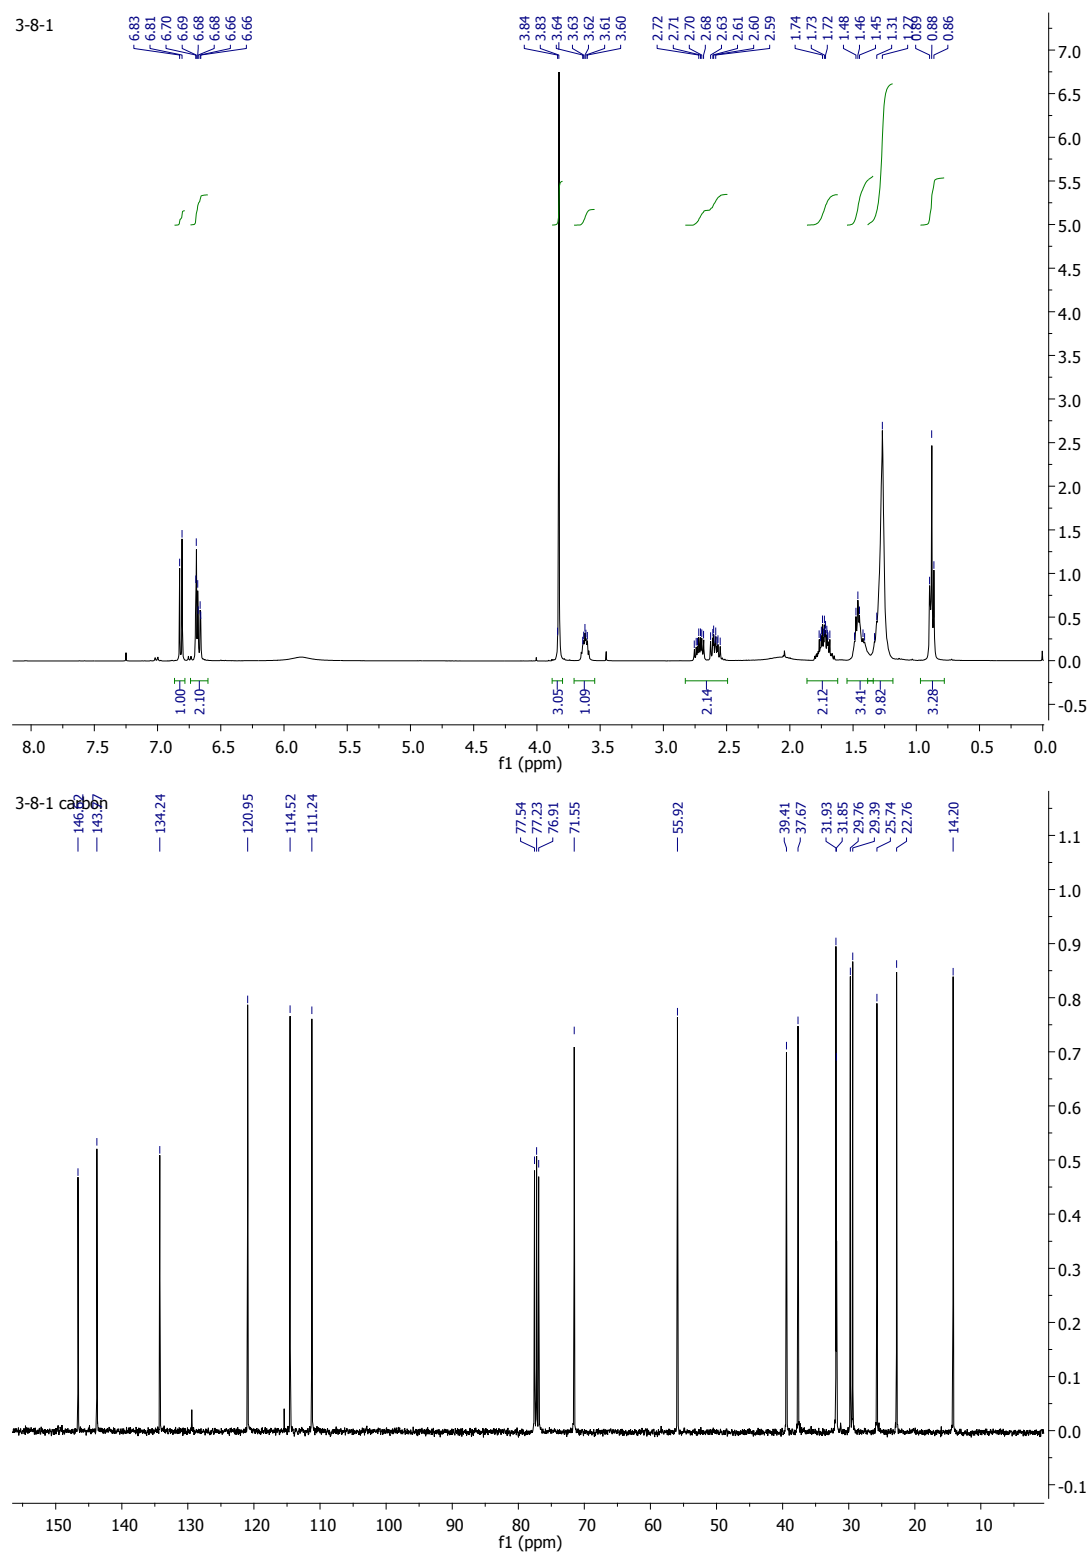Figure S10. <sup>1</sup>H and <sup>13</sup>C-NMR charts of dihydro-6-paradol (6).

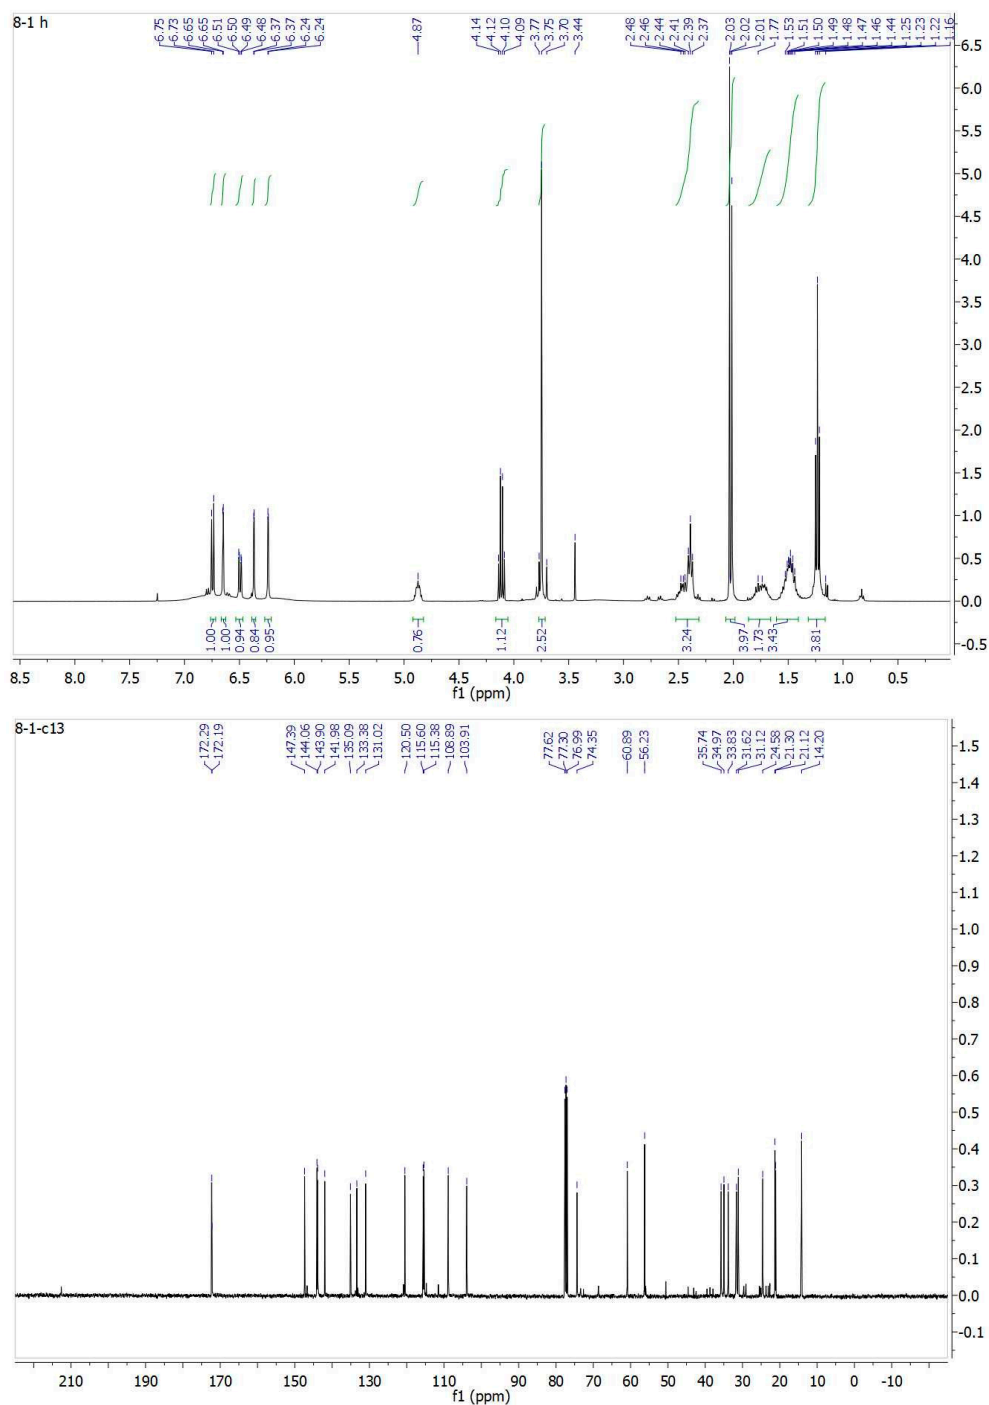Figure S11.  $^1\text{H}$  and  $^{13}\text{C}$ -NMR charts of DIACHEP (7).

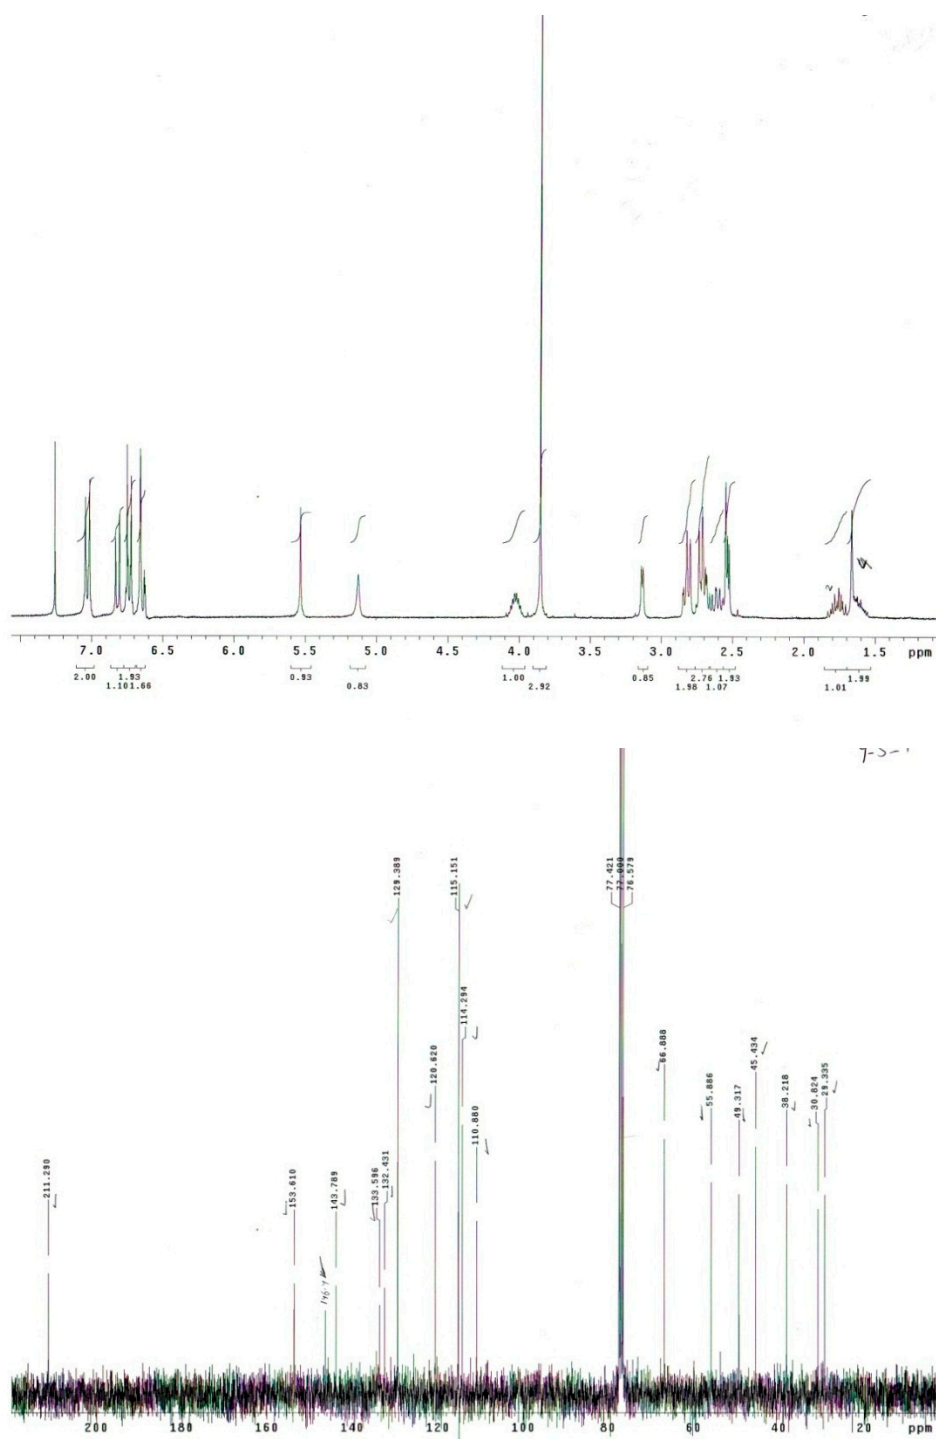

Figure S12.  $^1\text{H}$  and  $^{13}\text{C}$ -NMR charts of dihydrogingerone-C (8).

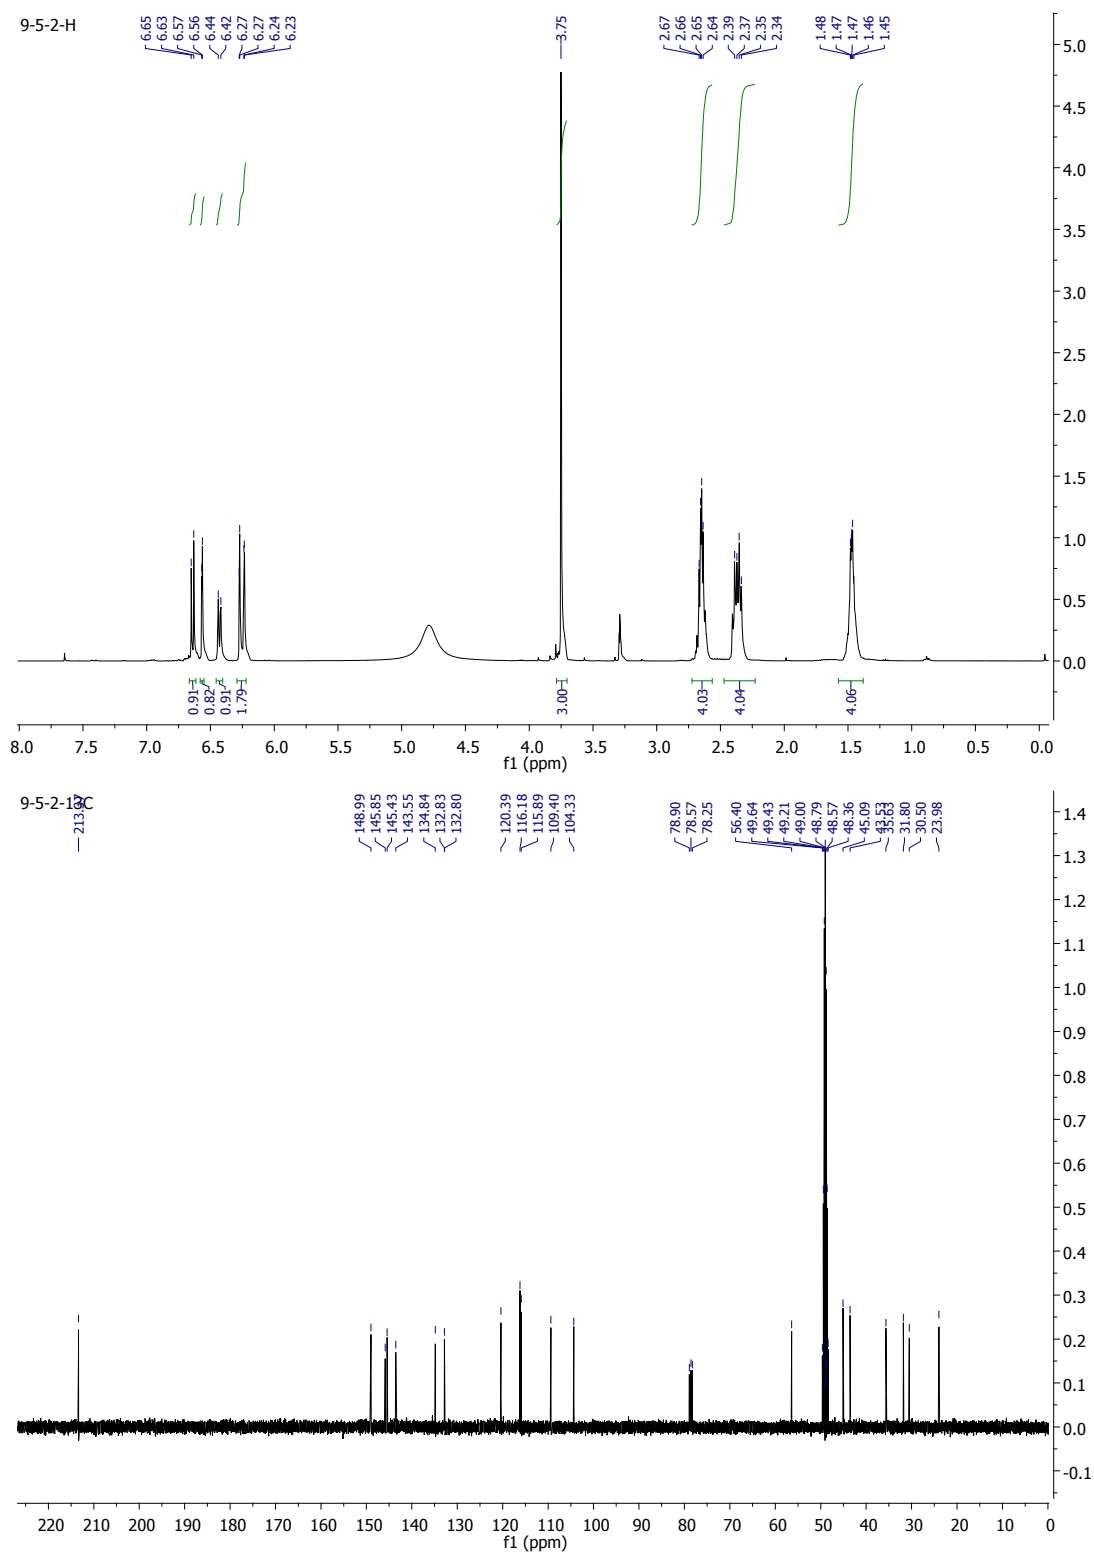Figure S13.  $^1\text{H}$  and  $^{13}\text{C}$ -NMR charts of dihydrogingerone-A (9).
